# Supplementary material
Source: MDPI journal article supplement (https://www.mdpi.com/2227-9717/10/1/142)
Supplement: s1 [file s1 › processes-1491574-supplementary.pdf]

# Chromium Distribution, Leachability and Speciation in a Chrome Plating Site

Jiacong Sun <sup>1,2</sup>, Yating Luo <sup>1,2</sup>, Jien Ye <sup>1,2</sup>, Chunhui Li <sup>1,2</sup> and Jiyan Shi <sup>1,2,\*</sup>

<sup>1</sup> Department of Environmental Engineering, College of Environmental and Resource Sciences, Zhejiang University, Hangzhou 310058, China; wssjc111@126.com (J.S.) ; luoyating@zju.edu.cn (Y.L.); yejien@zju.edu.cn (J.Y.); 0619365@zju.edu.cn (C.L.)

<sup>2</sup> MOE Key Laboratory of Environment Remediation and Ecological Health, College of Environmental & Resource Science, Zhejiang University, Hangzhou 310058, China

\* Correspondence: shijian@zju.edu.cn; Tel.: +86-571-8898-2019

## Abstract:

Table S1: Heavy metal contents and pollution assessment results of contaminated soils at sampling point S2.

Table S2: Heavy metal contents and pollution assessment results of contaminated soils at sampling point S3.

Table S3: Heavy metal contents and pollution assessment results of contaminated soils at sampling point S5.

Figure S1: X-ray diffraction (XRD) powder pattern of the three soil layers.

Figure S2: The vertical distribution of copper and zinc in soils at sampling points S3 and S5.

**Table S1.** pH, CaCO<sub>3</sub> contents, I<sub>geo</sub> and Cr concentrations extracted by TCLP of soils at contaminated sampling point S2.

| Soil samples | Depth<br>(m) | pH   | Soil<br>texture  | CaCO <sub>3</sub><br>% | I <sub>geo</sub> | Concentrations extracted by<br>TCLP |        |
|--------------|--------------|------|------------------|------------------------|------------------|-------------------------------------|--------|
|              |              |      |                  |                        |                  | Total Cr                            | Cr(VI) |
| S2-1         | 0~0.2        | 8.25 | Backfill<br>soil | 6.14                   | 0                | 17.42                               | 13.48  |
| S2-2         | 0.2~0.4      | 8.35 |                  |                        | 0                | 1.28                                | 0.84   |
| S2-3         | 0.4~0.6      | 8.47 |                  |                        | 0                | 1.16                                | 0.77   |
| S2-4         | 0.6~0.8      | 8.54 |                  |                        | 0                | 0.27                                | 0.22   |
| S2-5         | 0.8~1.0      | 8.66 | Loam             | 5.42                   | 1                | 0.44                                | 0.28   |
| S2-6         | 1.0~1.4      | 8.60 |                  |                        | 1                | 5.73                                | 3.57   |
| S2-7         | 1.4~1.8      | 8.00 |                  |                        | 1                | 19.76                               | 15.41  |
| S2-8         | 1.8~2.2      | 8.33 |                  |                        | 0                | 18.81                               | 16.72  |
| S2-9         | 2.2~2.6      | 8.14 | Sandy<br>loam    | 6.17                   | 0                | 43.37                               | 33.40  |
| S2-10        | 2.6~3.0      | 8.00 |                  |                        | 1                | 63.28                               | 58.85  |

**Table S2.** pH, CaCO<sub>3</sub> contents, I<sub>geo</sub> and Cr concentrations extracted by TCLP of soils at contaminated sampling point S3.

| Soil<br>samples | Depth<br>(m) | pH   | Soil<br>texture  | CaCO <sub>3</sub><br>% | I <sub>geo</sub> | Concentrations extracted by<br>TCLP |        |
|-----------------|--------------|------|------------------|------------------------|------------------|-------------------------------------|--------|
|                 |              |      |                  |                        |                  | Total Cr                            | Cr(VI) |
| S3-1            | 0~0.2        | 8.10 | Backfill<br>soil | 3.13                   | 6                | 174.16                              | 127.45 |
| S3-2            | 0.2~0.4      | 8.91 |                  |                        | 4                | 79.30                               | 63.44  |
| S3-3            | 0.4~0.6      | 8.04 |                  |                        | 3                | 107.53                              | 96.64  |
| S3-4            | 0.6~0.8      | 6.33 |                  |                        | 4                | 128.79                              | 110.59 |
| S3-5            | 0.8~1.0      | 4.00 |                  |                        | 5                | 208.53                              | 204.21 |
| S3-6            | 1.0~1.4      | 3.79 | Loam             | 1.47                   | 6                | 335.86                              | 311.26 |
| S3-7            | 1.4~1.8      | 5.98 |                  |                        | 6                | 430.23                              | 421.09 |
| S3-8            | 1.8~2.2      | 3.58 |                  |                        | 6                | 362.51                              | 338.06 |
| S3-9            | 2.2~2.6      | 7.93 | Sandy<br>loam    | 6.21                   | 0                | 26.57                               | 24.76  |
| S3-10           | 2.6~3.0      | 8.04 |                  |                        | 0                | 28.11                               | 27.43  |

**Table S3.** pH, CaCO<sub>3</sub> contents, I<sub>geo</sub> and Cr concentrations extracted by TCLP of soils at contaminated sampling point S5.

| Soil samples | Depth<br>(m) | pH   | Soil<br>texture  | CaCO <sub>3</sub><br>% | I <sub>geo</sub> | Concentrations extracted by<br>TCLP |        |
|--------------|--------------|------|------------------|------------------------|------------------|-------------------------------------|--------|
|              |              |      |                  |                        |                  | Total Cr                            | Cr(VI) |
| S5-1         | 0~0.2        | 8.21 | Backfill<br>soil | 3.24                   | 4                | 40.93                               | 30.06  |
| S5-2         | 0.2~0.4      | 8.07 |                  |                        | 5                | 58.82                               | 48.67  |
| S5-3         | 0.4~0.6      | 8.13 |                  |                        | 2                | 52.77                               | 32.03  |

|       |         |      |       |      |   |       |       |
|-------|---------|------|-------|------|---|-------|-------|
| S5-4  | 0.6~0.8 | 8.46 |       |      | 1 | 14.90 | 12.10 |
| S5-5  | 0.8~1.0 | 8.51 |       |      | 1 | 18.75 | 10.86 |
| S5-6  | 1.0~1.4 | 8.75 | Loam  | 4.07 | 1 | 1.86  | 1.46  |
| S5-7  | 1.4~1.8 | 8.78 |       |      | 0 | 4.08  | 3.76  |
| S5-8  | 1.8~2.2 | 8.80 |       |      | 0 | 7.25  | 4.17  |
| S5-9  | 2.2~2.6 | 8.57 | Sandy | 6.88 | 0 | 5.93  | 4.55  |
| S5-10 | 2.6~3.0 | 8.45 | loam  |      | 1 | 6.85  | 9.71  |

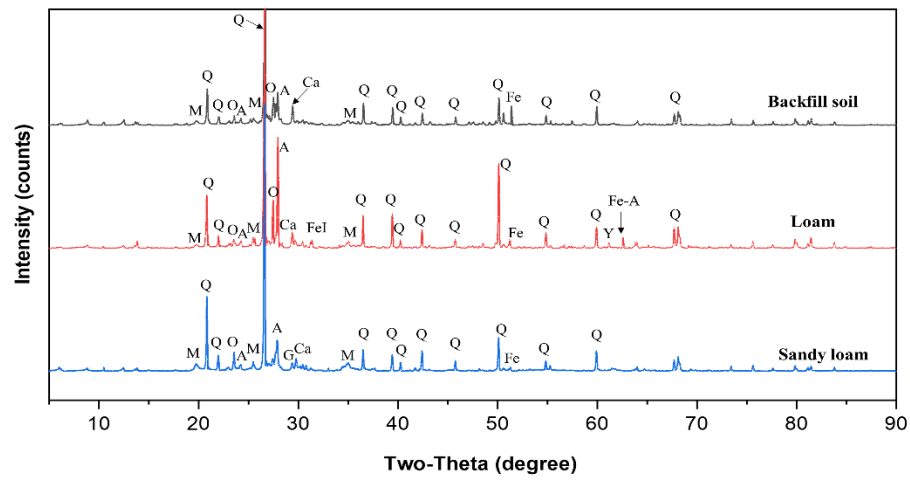

**Figure S1.** X-ray diffraction (XRD) powder pattern of the three soil layers. (Q=quartz  $\text{SiO}_2$ , A=albite, M=muscovite-2M1, O=orthoclase, Fe=fayalite, Fe-A=andradite, G=gedrite, Ca=calcite, Y=yedlinite).

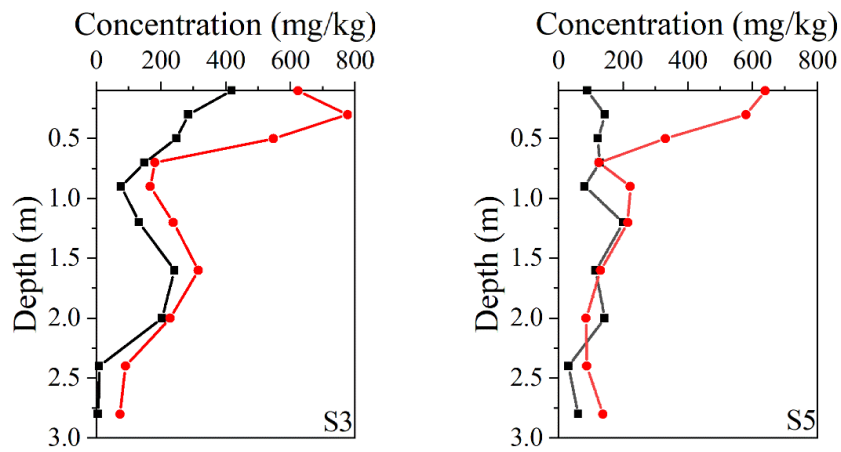

**Figure S2.** The vertical distribution of copper and zinc in soils at sampling points S3 and S5.

## **Reference**

1. China Environmental Monitoring Station (CNEMS), 1990. Element background values of soils in China [M]. China Environmental Sciences Press, Beijing, pp. 87–496.
2. Muller, G., 1969. Index of geo-accumulation in sediments of the Rhine River. *Geo. J.* 1969, 2, 108–118.
